# Genome-wide characterization of Foxa2 targets reveals upregulation of floor plate genes and repression of ventrolateral genes in midbrain dopaminergic progenitors

Emmanouil Metzakopian<sup>1</sup>, Wei Lin<sup>1</sup>, Mali Salmon-Divon<sup>2,\*</sup>, Heidi Dvinge<sup>2</sup>, Elisabet Andersson<sup>3</sup>, Johan Ericson<sup>3</sup>, Thomas Perlmann<sup>3,4</sup>, Jeffrey A. Whitsett<sup>5</sup>, Paul Bertone<sup>2,6</sup> and Siew-Lan Ang<sup>1,†</sup>

## SUMMARY

The transcription factors Foxa1 and Foxa2 promote the specification of midbrain dopaminergic (mDA) neurons and the floor plate. Whether their role is direct has remained unclear as they also regulate the expression of Shh, which has similar roles. We characterized the Foxa2 cis-regulatory network by chromatin immunoprecipitation followed by high-throughput sequencing of mDA progenitors. This identified 9160 high-quality Foxa2 binding sites associated with 5409 genes, providing mechanistic insights into Foxa2-mediated positive and negative regulatory events. Foxa2 regulates directly and positively key determinants of mDA neurons, including *Lmx1a*, *Lmx1b*, *Msx1* and *Ferd3l1*, while negatively inhibiting transcription factors expressed in ventrolateral midbrain such as *Helt*, *Tle4*, *Otx1*, *Sox1* and *Tal2*. Furthermore, Foxa2 negatively regulates extrinsic and intrinsic components of the Shh signaling pathway, possibly by binding to the same enhancer regions of co-regulated genes as Gli1. Foxa2 also regulates the expression of floor plate factors that control axon trajectories around the midline of the embryo, thereby contributing to the axon guidance function of the floor plate. Finally, this study identified multiple Foxa2-regulated enhancers that are active in the floor plate of the midbrain or along the length of the embryo in mouse and chick. This work represents the first comprehensive characterization of Foxa2 targets in mDA progenitors and provides a framework for elaborating gene regulatory networks in a functionally important progenitor population.

**KEY WORDS:** Dopaminergic neuron specification, Foxa2, Forkhead, Chromatin immunoprecipitation, Mouse, Floor plate

## INTRODUCTION

Foxa1 and Foxa2 (Foxa1/2) are members of the Foxa family of forkhead/winged helix transcription factors, which have diverse roles in regulating development, tissue homeostasis and tumorigenesis (reviewed by Hannehalli and Kaestner, 2009). Foxa1/2 regulate the development of endoderm tissues, including liver (Lee et al., 2005), lung (Wan et al., 2005) and pancreas (Gao et al., 2008). Within the central nervous system (CNS), Foxa1/2 regulate the specification and differentiation of midbrain dopaminergic (mDA) neurons (Lin et al., 2009) and hindbrain serotonergic neurons (Jacob et al., 2007). Foxa2 also regulates adaptive behavior during fasting in the hypothalamus (Silva et al., 2009).

mDA progenitors arise from the floor plate (FP) region of the midbrain and caudal diencephalon (Andersson et al., 2006b; Ono et al., 2007). We have previously established by analyzing mouse mutants that Foxa1 and Foxa2 function cooperatively to regulate mDA progenitor specification and differentiation in a dose-dependent manner by regulating the expression of key regulatory

genes such as *Lmx1a*, *Lmx1b* and *Neurog2* (Ferri et al., 2007; Lin et al., 2009). However, it was not possible to establish intrinsic roles for Foxa1/2 in regulating the expression of these genes as Foxa1/2 directly regulate sonic hedgehog (Shh) expression, and Shh also functions as an upstream regulator of the expression of these genes (Andersson et al., 2006b). Moreover, Foxa1/2 cooperatively regulate distinct sets of target genes in mDA progenitors, immature neurons and mature neurons (Ang, 2009). How Foxa1/2 regulate distinct target genes at different phases of mDA neuron lineage development is not known.

We set out to identify Foxa2 target genes on a genome-wide scale using chromatin immunoprecipitation followed by high-throughput sequencing (ChIP-seq). Our studies led to the identification of 9160 Foxa2-bound regions (FBRs); 178 and 108 genes annotated to Foxa2-bound regions were specifically expressed in the FP and ventrolateral regions of the midbrain, respectively. Interestingly, Foxa2 positively regulates the expression of FP-specific genes while negatively regulating the expression of ventrolateral-specific genes in mDA progenitors to specify mDA and FP identity. These results are consistent with studies in mouse mutants, which have demonstrated a function of Foxa genes in promoting ventral FP and mDA identity at the expense of lateral midbrain GABAergic neuron identity (Lin et al., 2009). Foxa2 also regulates the expression of factors involved in guiding axons around the FP in both rostral and caudal regions of the CNS. We also show that Foxa2 negatively regulates multiple components of the Shh signaling pathway by inhibiting Gli1 and Gli2 expression as well as the expression of some common Gli1-upregulated target genes, possibly by binding to the same enhancer regions. In addition, our data will also serve as an important resource for identifying novel genes that regulate mDA progenitor function.

<sup>1</sup>Department of Developmental Neurobiology, NIMR, The Ridgeway, London, NW7 1AA, UK. <sup>2</sup>EMBL European Bioinformatics Institute, Wellcome Trust Genome Campus, Cambridge CB10 1SD, UK. <sup>3</sup>Karolinska Institutet, Department of Cell and Molecular Biology, von Eulers väg 3, 171 77 Stockholm, Sweden. <sup>4</sup>Ludwig Institute for Cancer Research, Nobels väg 3, Karolinska Institutet, 71 77 Stockholm, Sweden. <sup>5</sup>Division of Pulmonary Biology, Cincinnati Children's Hospital Medical Center and University of Cincinnati College of Medicine, Cincinnati, OH 45229, USA. <sup>6</sup>Genome Biology and Developmental Biology Units, EMBL, 69117 Heidelberg, Germany.

\*Present address: Cancer Research Center, Chaim Sheba Medical Center, Tel Hashomer 52621, Israel

†Author for correspondence (sang@nimr.mrc.ac.uk)

## MATERIALS AND METHODS

### Differentiation of embryonic stem (ES) cells

E14.1 (NesE-Lmx1a) ES cells were cultured and differentiated as described (Andersson et al., 2006b).

### ChIP-qPCR reactions

Foxa2 ChIP experiments were performed on chromatin prepared from dissected E12.5 ventral midbrain tissue using Foxa2-specific antiserum as described (Lin et al., 2009). Primers of genomic regions are provided in supplementary material Table S4. The *Foxa2* open reading frame was used as a negative control for non-specific enrichment. The fold enrichment of each target site was calculated as 2 to the power of the cycle. The enrichment of target sequences in ChIP material was calculated relative to the input.

### ChIP-seq and data analysis

The ChIP sample was generated from *NestinLmx1a* stably transfected ES cells that had been differentiated into mDA progenitors (day 5 in vitro) as described (Andersson et al., 2006b). Cells were cross-linked as described (Lin et al., 2009). After washing in PBS to remove excess formaldehyde and glycine,  $2 \times 10^7$  fixed cells were homogenized in 300  $\mu$ l cold whole-cell lysis buffer (10 mM Tris-HCl pH 8.0, 10 mM NaCl, 3 mM MgCl<sub>2</sub>, 1% NP40, 1% SDS) and protease inhibitors. After incubating on ice for 10 minutes, lysates were sonicated using a Diagenode Bioruptor (30-second on/off pulses for 10 minutes, on the high setting). Debris was removed by centrifugation at 13,000 g for 10 minutes, and the supernatant was collected and snap frozen in liquid nitrogen. As input, 10  $\mu$ l of sonicated chromatin was incubated in PBS with 200 mM NaCl overnight at 65°C, treated with proteinase K and purified using the QIAquick PCR Purification Kit (Qiagen). Immunoprecipitations were performed as described (Lin et al., 2009).

For ChIP-seq experiments, the immunoprecipitated DNA was modified for sequencing following the manufacturer's protocol (Illumina). ChIP-seq libraries were sequenced on the Illumina GAIIx using two lanes per sample for increased coverage at the EMBL Genomics Core Facility, Heidelberg, Germany. Sequencing reads were aligned to the mouse genome (mm9) using MAQ v0.6.8 (Li et al., 2008), where reads with low mapping quality (<13), greater than three mismatches or that mapped to more than a single genomic location were excluded from downstream analysis. Foxa2 binding sites were then identified with MACS v1.3.4 (Zhang et al., 2008). Peak annotation was performed using PeakAnalyzer (Salmon-Divon et al., 2010) and CEAS, where peak summits (as defined by MACS) and genes from the UCSC Refseq track were used as input (Shin et al., 2009) and MEME was used for de novo motif analysis (Bailey and Elkan, 1994). RegionMiner release 4.0 (Genomatix, Munich, Germany) was used to determine over-representation relative to the genome of the Foxa2 motif identified by MEME. Genomic coordinates defined by MACS with less than 5% false discovery rate (FDR) are provided in supplementary material Table S1. ChIP-seq data are available at ArrayExpress under accession E-MTAB-1137.

### Functional analysis by Gene Ontology (GO)

Significance of enrichment between any two sets of genes was determined by applying the hypergeometric distribution as described by Gennet et al. (Gennet et al., 2011), where  $x$  is the number of genes shared by two gene lists (FP=178, VL=108),  $n$  is the number of genes identified by ChIP-seq (5409),  $M$  is the number of genes of the second list (FP=444, VL=312), and  $N$  is the number of all Ensembl genes (37,361). Note that the number of genes was used rather than the probe number (entities) as provided by Gennet et al. because some genes in the microarray experiment are annotated by multiple probes. An equivalently sized list of random genes was used as a negative control. GO analysis was performed using GOToolBox (<http://genome.crg.es/GOToolBox>), using the Mouse Genome Informatics identities of the list of genes. Gene lists and GO term results are provided in supplementary material Table S2.

### Generation and analysis of transgenic mice

Transgenes for injection were separated from vector sequences by electrophoresis in 1% agarose gels, purified on Qiagen PCR extraction columns, precipitated and resuspended in injection buffer (10 mM Tris-HCl pH 7.5, 0.1 mM EDTA). Transgenic mice were generated by standard

procedures (Scardigli et al., 2001) using fertilized eggs from (CBA/CA  $\times$  C57Bl10) crosses. Transgenic embryos were identified by PCR with *lacZ* primers: F, 5'-CGAGTGTGATCATCTGGTTCG-3'; and R, 5'-TTACCTTGTGGAGCGACATC-3'. E10-10.5 embryos were dissected from the uterus in cold PBS and fixed for 30 minutes at room temperature in 4% formaldehyde in PBS (pH 7.2). Whole-mount  $\beta$ -gal staining and analysis of the embryos were performed as described (Scardigli et al., 2001). Reporter gene expression within the developing neural tube was examined using whole-mount or 7  $\mu$ m paraffin sections.

### Generation of reporter constructs

Regulatory sequences beneath Foxa2 peak regions called by MACS were selected according to the limits defined by the highest sequence conservation among multiple vertebrate species from the UCSC genome browser (<http://genome.ucsc.edu/>). All regulatory sequences assayed were cloned into the *Xba*I site of a reporter vector comprising the  $\beta$ -globin promoter, *lacZ* cDNA, SV40 large T antigen poly(A) site, and sequences mediating *Lmx1a* E1, E2, E3, *Lmx1b* E1, and *Corin* E1 activity in an arrangement that retains the native orientation of these genes. All DNA sequences tested were generated by PCR amplification, the primer sequences for which are listed in supplementary material Table S4. Point mutations designed to disrupt DNA binding at the recognition sequences for Foxa2 were performed using the QuikChange Mutagenesis Kit (Agilent Technologies) with 5'-GGGCAGTGCTACCCACTCAGTCTCTGC-3' (mutated residues underlined). The integrity and orientation of all constructs containing PCR-generated fragments were confirmed by DNA sequencing.

### Generation and genotyping of mutant embryos and animals

All mouse strains were maintained in a mixed MF1-129/SV background. *En1K1<sup>Cre/+</sup>*, *Foxa2<sup>flox/flox</sup>* and *Foxa1<sup>loxP/loxP</sup>* mouse strains were generated as described (Sapir et al., 2004; Hallonet et al., 2002; Gao et al., 2008). Here, we refer to the *Foxa1<sup>loxP</sup>* allele as *Foxa1<sup>flox</sup>*. *Foxa1<sup>flox/flox</sup>*; *Foxa2<sup>flox/flox</sup>* mice were generated by crossing *Foxa1<sup>flox/flox</sup>* with *Foxa2<sup>flox/flox</sup>* animals. To obtain conditional *Foxa1* and *Foxa2* double mutants, we first crossed *En1K1<sup>Cre/+</sup>* mice with *Foxa1<sup>flox/flox</sup>*; *Foxa2<sup>flox/flox</sup>* animals. Subsequently, *En1K1<sup>Cre/+</sup>*; *Foxa1<sup>flox/+</sup>*; *Foxa2<sup>flox/+</sup>* F1 male animals were mated to *Foxa1<sup>flox/flox</sup>*; *Foxa2<sup>flox/flox</sup>* females to generate *En1K1<sup>Cre/+</sup>*; *Foxa1<sup>flox/flox</sup>*; *Foxa2<sup>flox/flox</sup>* double mutants. The *Foxa2<sup>flox</sup>* and *Foxa1<sup>flox</sup>* alleles were detected by PCR (Hallonet et al., 2002; Gao et al., 2008); the *Cre* transgene was detected using the pair of primers and PCR conditions described previously (Indra et al., 1999). *NestinCre/+*; *Foxa1<sup>-/-</sup>*; *Foxa2<sup>flox/flox</sup>* animals were generated as described (Ferri et al., 2007). Animals were handled according to the Society of Neuroscience Policy on the Use of Animals in Neuroscience Research, as well as the European Communities Council Directive.

### RNA extraction and cDNA synthesis

Ventral midbrain tissue was dissected from three *Foxa1<sup>flox/flox</sup>*; *Foxa2<sup>flox/flox</sup>* control embryos and three *En1K1<sup>Cre/+</sup>*; *Foxa1<sup>flox/flox</sup>*; *Foxa2<sup>flox/flox</sup>* embryos. Total RNA isolation was carried out using the Pico Pure RNA Extraction Kit (Arcturus) according to the manufacturer's instructions. RNA was reverse transcribed using Superscript III (Invitrogen) to obtain cDNA for use in quantitative (q) PCR reactions. For quantitative analysis of the expression level of mRNAs, real-time PCR analyses using Platinum SYBR Green Super Mix (Invitrogen) were performed in triplicate using the 7900 PCR System (ABI). Oligonucleotides amplifying small amplicons were designed using Primer3 (BioTools, <http://biotools.umassmed.edu>). Amplifications were performed in 20  $\mu$ l containing 0.5  $\mu$ M each primer. 0.5  $\times$  SYBR Green (Invitrogen) and 2  $\mu$ l 50-fold diluted cDNA, with 45 cycles at 95°C for 30 seconds, 60°C for 30 seconds, 72°C for 30 seconds, and 79°C for 5 seconds. The dissociation curve of each PCR product was determined to ensure that the observed fluorescent signals were only from specific PCR products. After each PCR cycle, the fluorescent signals were detected at 79°C. The fluorescent signals from specific PCR products of cDNA prepared from mutant or control (wild-type littermate) ventral midbrain tissue were normalized to that of *Gapdh* ( $2^{\text{Ct } \text{Gapdh} - \text{Ct } \text{gene tested}}$ ), and then relative values were calculated

by setting the normalized value of the control as 1. All reactions were repeated using at least three independent samples (biological replicates), and one-way ANOVA and Dunnett's test were used to calculate the significance of the fold change in the expression of genes in the mutant compared with the wild-type control. Primers are provided in supplementary material Table S5.

#### Chick embryo electroporation

The *lacZ* reporter constructs containing the selected genomic regions bound by Foxa2 were electroporated into naïve chick midbrain neuroepithelium at Hamilton and Hamburger stage 10. The embryos were allowed to develop for 48 hours and then analyzed by whole-mount  $\beta$ -gal staining as described above. The empty vector was used as a negative control.

#### Immunohistochemistry

Cells were fixed in 4% paraformaldehyde (PFA) for 10 minutes at room temperature. Chick embryos were fixed in 4% PFA for 1 hour on ice. Cells or cryosectioned chick tissue were then washed with 1 $\times$  PBS and incubated for 10 minutes in blocking solution (5% fetal bovine serum and 0.1% Triton X-100 in PBS). Primary antibody was added and cells were incubated at 4°C overnight. Cells were then washed three times with PBS containing 0.1% Triton X-100. Secondary antibody was added and cells were incubated at room temperature for 1 hour. Antibodies used were rabbit anti-Nurr1 (Nr4a2 – Mouse Genome Informatics) (Santa Cruz), mouse anti-tyrosine hydroxylase (Th; Chemicon), rabbit anti-Lmx1a (Andersson et al., 2006b), mouse anti-Tuj1 (Tubb3 – Mouse Genome

Informatics; Chemicon), mouse anti-*nestin* (Chemicon), rabbit anti-Foxa2 (Wan et al., 2005), rabbit anti- $\beta$ -gal (Biogenesis) and sheep anti-GFP (Biogenesis).

#### In situ hybridization of brain sections

Section in situ hybridization of E10.5 mouse brains was performed as described (Lin et al., 2009). The following probes were used: *Tal2* [a PCR fragment corresponding to the first 600 bp of the *Tal2* cDNA clone (NCBI gene ID: 21350)], *Sox1* (Collignon et al., 1996), *Tle4*, *Otx1* and *Pax3* (Puelles et al., 2003).

## RESULTS

### Genome-wide characterization of Foxa2 binding sites in mDA progenitors

To identify direct target genes of Foxa2, we chose a genome-wide approach using ChIP-seq (Barski et al., 2007; Johnson et al., 2007; Robertson et al., 2007). As sufficient numbers of mDA progenitors could not be obtained from mouse embryos at E10.5, we obtained mDA progenitors by in vitro differentiation of *NestinLmx1a*-transfected ES cells (Andersson et al., 2006b). We efficiently generated 60-80% pure mDA progenitors after 5 days of differentiation of *NestinLmx1a*-transfected ES cells in the presence of Fgf8 and Shh (supplementary material Fig. S1A,B) (Andersson et al., 2006b). These in vitro generated mDA progenitors robustly expressed Foxa2 at day 5 and differentiated further into Nurr1<sup>+</sup> Th<sup>+</sup>

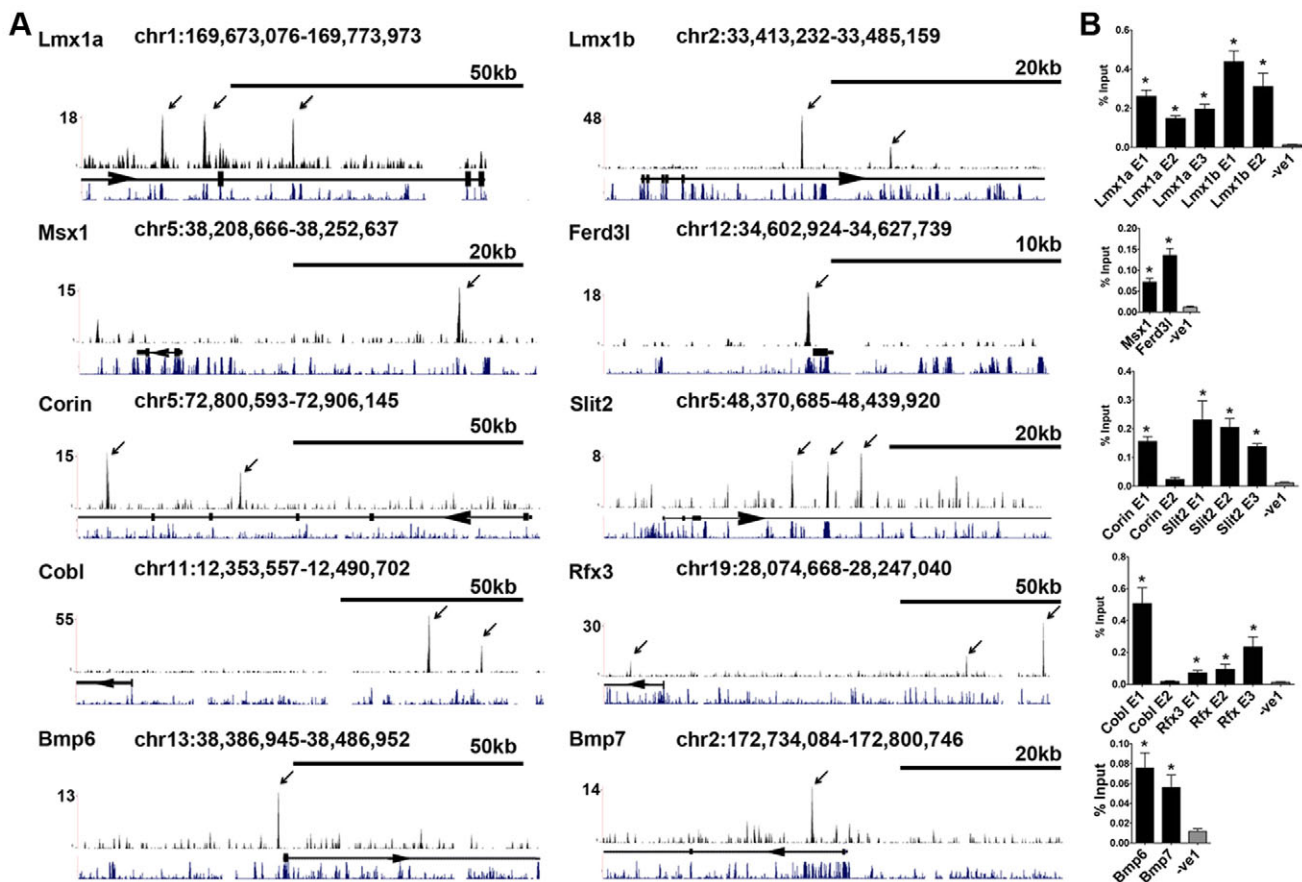

**Fig. 1. Chromatin immunoprecipitation of in vitro-differentiated murine mDA progenitors.** (A) Peaks of Foxa2 enrichment identified by ChIP-seq are shown for selected mDA progenitor-expressed genes. The plots show the peak heights as numbers of sequenced reads. Arrows indicate peak locations called by MACS. (B) Independent ChIP-qPCR experiments were performed with chromatin prepared from E12.5 ventral midbrain tissue for validation of selected candidate targets, where enrichment is shown as percentage of input (\* $P$ <0.05). Multiple peaks within a gene region, corresponding to the list in supplementary material Table S1, are numbered E1 (for Element 1), and so on, from left to right. -ve1, Foxa2 open reading frame (Mavromatakis et al., 2011). Error bars indicate s.e.m.



mature mDA neurons by day 8, as previously described (supplementary material Fig. S1A,B) (Andersson et al., 2006b). In addition, *in vitro* differentiated mDA progenitors have been shown to develop into bona fide mDA neurons that integrate and innervate the striatum of 6-hydroxydopamine lesioned neonatal rats when transplanted into the striatum (Friling et al., 2009), indicating that they have a similar functional potential as embryonic mDA progenitors.

Ten million *NestinLmx1a*-transfected ES cells were used to prepare chromatin and a *Foxa2*-specific antibody was used for ChIP (Mavromatakis et al., 2011). Following sequencing, peak calling was performed using MACS with a threshold of FDR < 5%, resulting in a dataset of 9160 high confidence peaks. All FBRs were annotated to genes that have their transcription start site (TSS) closest to the peak. Several known and validated FBRs in the CNS were included in this study, such as the *Shh* brain enhancer (Epstein et al., 1999), *Foxa2* enhancer (Sasaki and Hogan, 1996), *Foxa1* promoter (Peterson et al., 1997) and *Ferd31* (*Nato3*) promoter (Mansour et al., 2011), but not the *Nkx2.2* and *Th* promoters (Lin et al., 2009). As the latter two genes are not expressed in our *in vitro* ES cell differentiation system, these gene loci might be in a closed chromatin configuration and inaccessible for *Foxa2* binding.

Validation of this dataset was performed by ChIP-qPCR on a selected subset of FBRs located in genes known to be expressed in the midbrain FP, including *Lmx1a*, *Lmx1b* (Andersson et al., 2006b), *Msx1* (Andersson et al., 2006b), *Ferd31* (Ono et al., 2010; Segev et al., 2001), *Corin* (Ono et al., 2007), *Slit2* (Wang et al., 1999), *Cobl* (Gasca et al., 1995), *Rfx3* (Baas et al., 2006), *Bmp6* and *Bmp7* (Kim et al., 2001), using chromatin from mouse E12.5 ventral midbrain that contains mostly FP tissue. *Foxa2*-dependent enrichment was confirmed in 17 out of 19 of these FBRs (Fig. 1A,B). We also confirmed *Foxa2* binding in 16 out of 20 additional FBRs located in selected transcriptionally active genes (supplementary material Fig. S2). Together, these results indicate a high-quality dataset.

## Binding site analysis

The peaks in FBRs had an average width of 290 bp and an average height of 16 tags (Fig. 1A). De novo motif analysis of their sequences using MEME (Zhang et al., 2008) revealed, as expected, a substantial enrichment in *Foxa2* motif sites (Fig. 2A). Of the peaks, 7298 (80%) contained at least one *Foxa2* motif within 60 bp of the peak summit (Fig. 2A). To further characterize the distribution of the peaks, we compared their locations with UCSC RefSeq genes using CEAS (Shin et al., 2009) and found that 46.7% of the high confidence peaks were located within a gene region extending from the TSS to the 3'UTR downstream (Fig. 2B). In total, 44.2% of all peaks were located within an intron, 0.7% within an exon, 0.8% within the 5'UTR and 1% within the 3'UTR. The remaining *Foxa2* peaks were in intergenic regions located further than 10 kb upstream or downstream of the annotated genes. Interestingly, *Foxa2* binding was enriched in promoter regions, with 3.7% of peaks located within 1 kb and 11% within 10 kb upstream of the TSS when compared with the genome background (Fig. 2B). *Foxa2* binding was not enriched in regions directly downstream of genes (Fig. 2B).

*Foxa2* and *Shh* signaling have similar roles in ventral midbrain patterning (Blaess et al., 2006; Lin et al., 2009); however, we recently found that *Foxa2* also attenuates *Shh* signaling by repressing the expression of its intracellular transducers *Gli1*, *Gli2* and *Gli3* (Mavromatakis et al., 2011). We therefore examined whether targets of *Gli1* that were previously identified by ChIP-chip in neural progenitors (Vokes et al., 2007) are also bound by *Foxa2*. *Foxa2* binding overlapped with ten out of 25 *Gli1* binding regions, including those located in *Ptch1*, *Nkx2.9*, *Gli1*, *Hhip*, *Shh* and *Prdx2*, many of which are known to function as *Gli*-dependent enhancers (Sasaki et al., 1997; Dai et al., 1999; Santagati et al., 2003; Agren et al., 2004; Hallikas et al., 2006) (Fig. 3 and supplementary material Table S3). These results therefore suggest that *Foxa2* and *Gli1* co-regulate a number of common targets through nearby binding sites in the

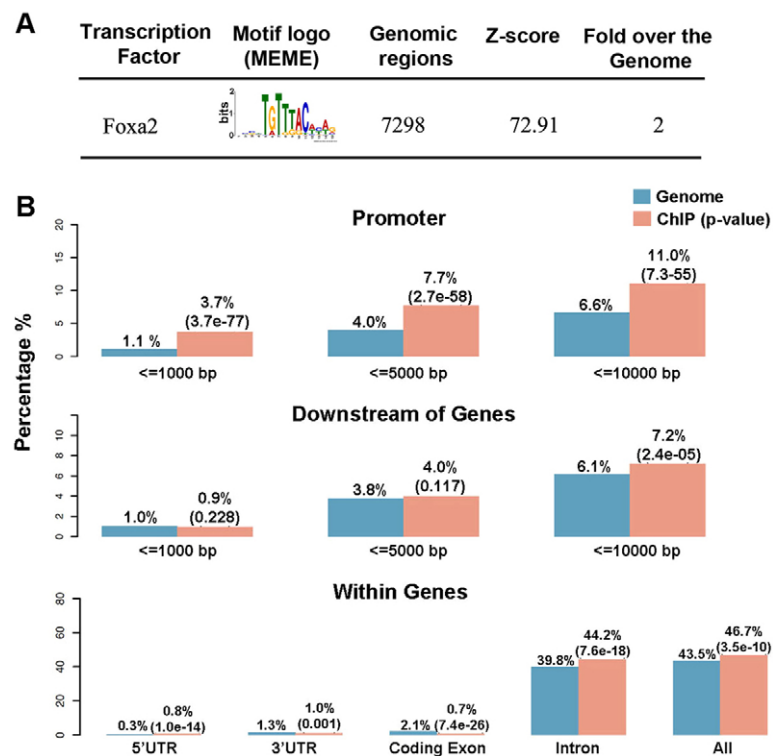

**Fig. 2. Analyses of motifs and peak distribution in *Foxa2*-bound regions.** (A) MEME identified de novo transcription factor binding motifs within 60 bp of the center of *Foxa2* peaks. Genomatix results include: (1) the number of peaks that contained the transcription factor binding motif; (2) the Z-score of over-representation against the selected background (randomized sequences); and (3) the over-representation against the mouse genome, which is the fold factor of the number of *Foxa2* motifs within the ChIP-seq dataset compared with an equally sized sample of the genome. (B) The distribution and enrichment relative to the genome background of *Foxa2* peaks with respect to different gene features. The *P*-value is given in parenthesis.

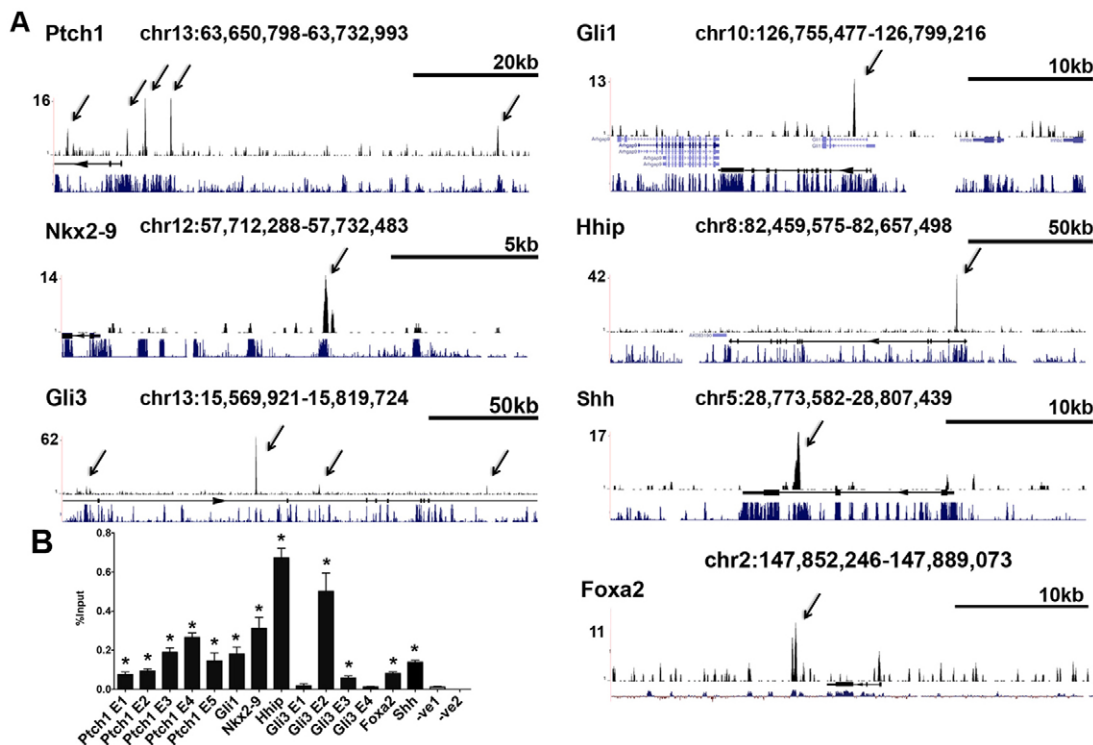

**Fig. 3. Foxa2 peaks in genes of the Shh pathway.** (A) Foxa2 binding sites were observed in genomic regions previously identified as bound by Gli1 (Vokes et al., 2007), including in the genes *Ptch1*, *Nkx2-9*, *Gli1*, *Hhip* and *Foxa2*. Peaks found in the *Shh* and *Gli3* genes are also included. (B) ChIP-qPCR experiments performed with chromatin from mouse E12.5 ventral midbrain tissue were used to validate the data (\* $P < 0.05$ ). Error bars indicate s.e.m. -ve1, *Foxa2* open reading frame; -ve2, Gli-ve (an upstream region of *Gli2*) (Mavromatakis et al., 2011).

genome. In addition, Foxa2 also bound sites in *Gli2* and *Gli3* (Mavromatakis et al., 2011) that are not known to be bound by Gli1 (Fig. 3), suggesting the possibility that Foxa2 directly regulates all three Gli genes.

### Foxa2 directly and positively regulates the expression of key determinants of the mDA lineage

In order to identify a core set of Foxa2 target genes that are functionally relevant for mDA neuronal progenitor and FP specification, we mapped FBRs to the nearest TSS of Ensembl genes. We then compared this set of Foxa2 candidate target genes with a list of 444 genes that are specifically expressed in the midbrain FP as generated by expression profiling of E10.5 mouse embryos (Gennet et al., 2011). Interestingly, 40% (178) of these FP genes were bound by Foxa2 (hypergeometric analysis,  $P = 2.27 \times 10^{-40}$ ; Fig. 4C), suggesting that Foxa2 directly regulates many of the genes expressed in this tissue. We then surveyed the functional annotations of these putative Foxa2 targets using Gene Ontology (GO). A wide spectrum of biological processes was significantly enriched, including cell growth, embryonic development, cell differentiation and cell communication (Fig. 4B). Foxa2 targets also display a diverse range of molecular functions, including transcriptional regulator activity, receptor binding and calcium ion binding (Fig. 4D).

To further address the functional significance of Foxa2 binding, we analyzed by qRT-PCR the expression of some of these targets in the midbrain FP of wild-type and *Foxa1/2* conditional mutant mouse embryos at E10.5. We selected targets involved in transcriptional regulation and receptor binding, two classes of

genes with potentially important roles in regulating cell identity. The expression of nine out of 17 Foxa2 targets with transcriptional activity and nine out of 18 targets with receptor binding activity was severely reduced in *En1Cre;Foxa1<sup>fllox/fllox</sup>;Foxa2<sup>fllox/fllox</sup>* (referred to as *Foxa1/2* cko) mutants compared with control embryos (Fig. 4E). Analysis of this sample therefore suggests that ~50% of the candidate FP targets identified in Fig. 4A are regulated in *Foxa1/2* cko embryos. Interestingly, five of the 17 bound and regulated targets identified in Fig. 4E, namely *Lmx1a* (Andersson et al., 2006b), *Msx1* (Andersson et al., 2006b), *Ferdl3* (Ono et al., 2010), *Foxa1* and *Foxa2* (Andersson et al., 2006b), are known to have essential roles in regulating mDA progenitor specification, suggesting that Foxa2 directly controls the expression of essential determinants of the lineage. *Lmx1b* also has a role in regulating the specification and differentiation of mDA neurons (Andersson et al., 2006b) and is bound (supplementary material Table S1) and regulated (Lin et al., 2009) by Foxa2. Its omission from the FP-specific gene list is presumably because its expression is not restricted to the FP but is also present in lateral midbrain progenitors. Taken together, these results suggest that Foxa2 has multiple direct inputs into the molecular pathways regulating the specification and differentiation of the mDA progenitor lineage.

### Foxa2 directly and positively regulates the expression of FP axon guidance molecules

In zebrafish embryos, Foxa2 is involved in maintenance of the differentiated character of the FP (Norton et al., 2005). In mouse embryos, Foxa2 is required for the induction of the FP through regulation of the secreted morphogen Shh (Ang and Rossant, 1994; Weinstein et al., 1994), but whether it also has later roles in FP

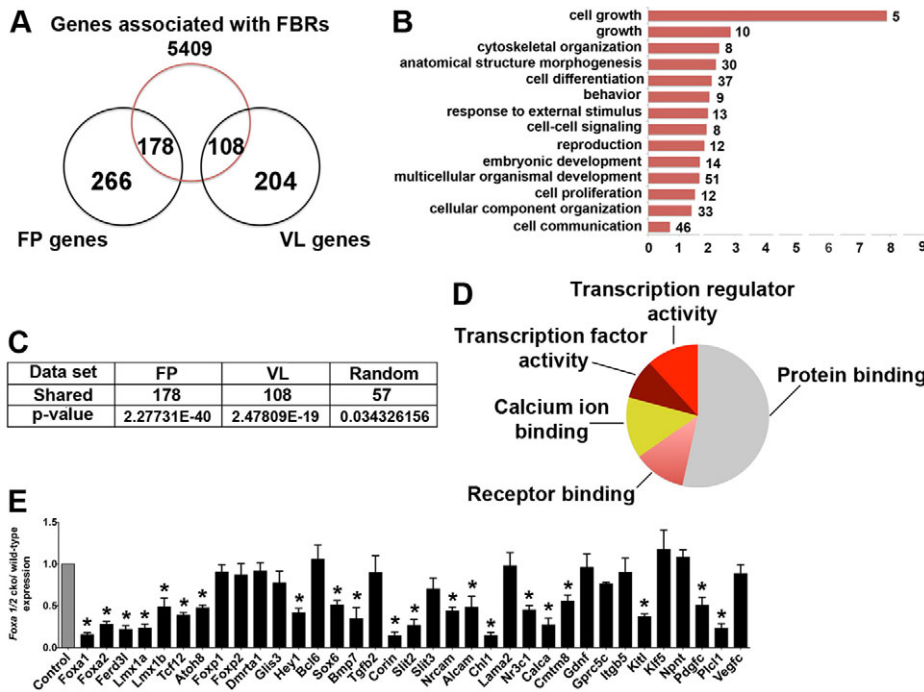

**Fig. 4. Foxa2 directly regulates genes with multiple developmental functions.**

(A) The overlap between genes associated with Foxa2 binding events and genes expressed predominantly in the floor plate (FP) or the ventrolateral region (VL) of the midbrain of E10.5 mouse embryos. FP and VL data were obtained from Gennet et al. (Gennet et al., 2011). (B) Enrichment of Gene Ontology (GO) terms from GO Slim for biological processes associated with FP-specific Foxa2-bound genes. The number of target genes in each category is shown. (C) The number of Foxa2 target genes in each region with statistical analysis. (D) Enrichment of GO terms for molecular functions (GO Slim) associated with FP-specific Foxa2-bound genes. (E) qRT-PCR analysis of selected FP-specific Foxa2-bound genes using ventral midbrain tissue from E10.5 wild-type and *Foxa1/2* cko embryos (\**P*<0.05). Error bars indicate s.e.m.

function is largely unknown. The FP expresses secreted and transmembrane proteins that regulate the growth of commissural axons across the midline (reviewed by Brose and Tessier-Lavigne, 2000). FP-specific Foxa2 targets include genes that encode factors with axon guidance activities (reviewed by Kolodkin and Tessier-Lavigne, 2011), such as the Slit ligands Slit2 and Slit3, the TGFβ superfamily members Tgfb2 and Bmp7, the cell adhesion molecules

of the immunoglobulin superfamily Alcam, Chl1 and Nrcam, and Shh (supplementary material Table S2). qRT-PCR experiments indicate that the expression of seven out of nine (78%) of these genes is reduced in *Foxa1/2* cko embryos (Fig. 4E), demonstrating a novel role for Foxa2 in promoting the expression of factors that control the guidance of axons across the ventral midline. Since the FP is transformed to more dorsal GABAergic progenitors, we cannot

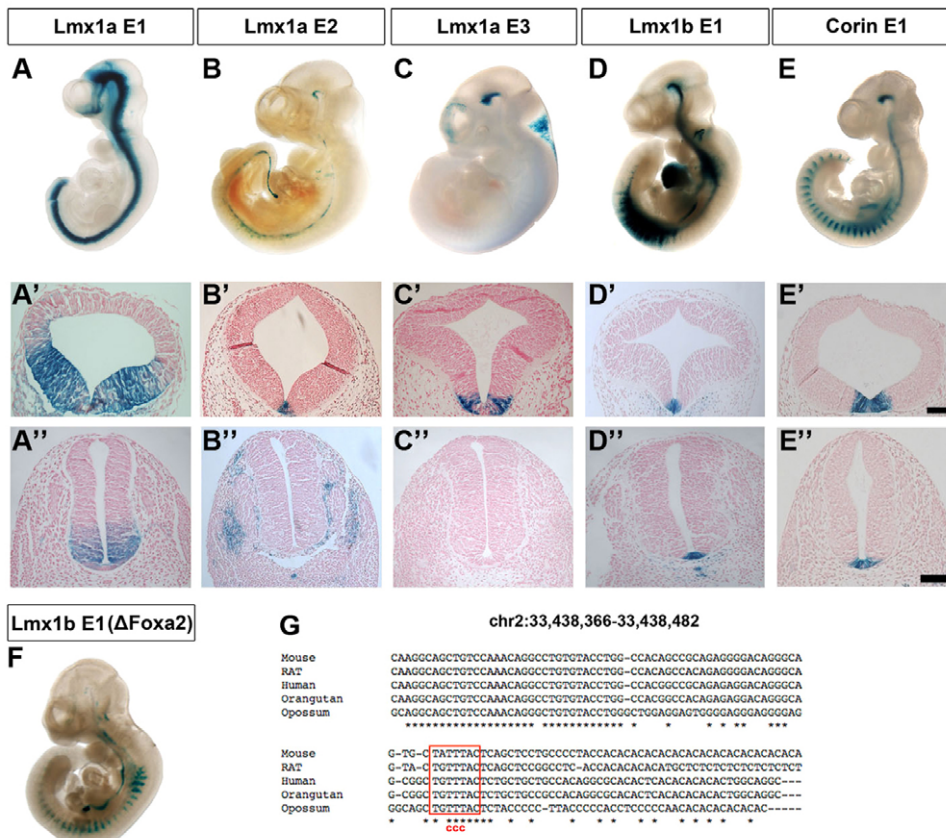

**Fig. 5. Successful prediction of FP enhancers from Foxa2 binding events in MDA progenitors.**

(A-E) E10.0-10.5 transgenic mouse embryos expressing *lacZ* from a minimal promoter and candidate enhancers bound by Foxa2 in the *Lmx1a*, *Lmx1b* and *Corin* genes. (A'-E') Histological sections through the midbrain (A'-E') and the spinal cord (A''-E''). (F) Whole-mount *lacZ* staining of transgenic embryos containing the *Lmx1b* E1 enhancer with a mutation in the Foxa2 binding site. (G) Multiple species alignment of the *Lmx1b* E1 enhancer using ClustalW, with the Foxa2 motif indicated by the red box and the nucleotide substitutions in the mutated version of the motif in red. Similar staining in midbrain tissue was observed in at least three transgenic embryos for each of the enhancers illustrated in this figure. Scale bars: 100 μm.



formally rule out the possibility that some of the changes in gene expression (Fig. 4E) in *Foxa1/2* cko mutants at E10.5 are a consequence of cell fate transformation (Lin et al., 2009). Therefore, we examined *Slit1*, *Slit2* and *Shh* expression also in *NestinCre/+;Foxa1<sup>-/-</sup>;Foxa2<sup>fllox/fllox</sup>* embryos, in which partial specification of the FP still occurs when *Foxa1/2* are deleted at E10.5. *Shh*, *Slit1* and *Slit2* are not expressed in the FP of these mutant embryos. By contrast, these genes are still expressed in the FP of wild-type embryos at E12.5 (supplementary material Fig. S3).

### Analysis of enhancer activity by transient *lacZ* transgenesis in mouse and chick embryos

To explore the contributions of FBRs to the cis-regulation of gene expression, we selected those associated with *Lmx1a*, *Lmx1b* and *Corin*, three genes expressed in mDA progenitors, for functional analysis by transgenesis. Foxa2 bound to three regions surrounding *Lmx1a* that are conserved in 15-18 species, referred to as E1, E2 and E3, and two conserved regions around *Lmx1b* termed E1 and E2 (supplementary material Table S4). These conserved elements were cloned into a minimal  $\beta$ -globin promoter-*lacZ* reporter plasmid and injected into fertilized mouse zygotes to assess their enhancer activity by X-gal staining at E10.5.

The three *Lmx1a* genomic regions, 522 bp E1, 881 bp E2 and 446 bp E3, promoted *lacZ* expression in transgenic embryos (Fig. 5A-C'). *Lmx1a* E1 transgenic embryos displayed  $\beta$ -galactosidase ( $\beta$ -gal) activity throughout the ventral neural tube, similar to the Foxa2 expression pattern (Fig. 5A-A'), whereas the pattern of  $\beta$ -gal activity in *Lmx1a* E2 and E3 transgenic embryos was restricted to the rostral part of the endogenous expression domain of *Lmx1a* (Andersson et al., 2006b), i.e. the caudal forebrain and anterior midbrain (Fig. 5B-C'). The identification of three enhancers for *Lmx1a* suggests that multiple cis-regulatory elements cooperate to specify the precise spatial expression pattern of this gene.

One *Lmx1b* element, the 206 bp E1 region, governed reporter gene expression in the FP of the midbrain and spinal cord and in future auditory tissue (Fig. 5D-D'), similar to the endogenous domains of *Lmx1b* expression (Guo et al., 2007). By contrast, none of the five transgenic embryos containing the *Lmx1b* E2 construct that were analyzed expressed  $\beta$ -gal at E10.5. We generated a mutation in the single Foxa2 binding site in the *Lmx1b* E1 enhancer to determine the requirement for Foxa2 binding for the activity of this element (Fig. 5G). The *Lmx1b* E1 Foxa2 mutant construct failed to drive  $\beta$ -gal expression in the FP throughout the anteroposterior axis of the embryo, heart and dorsal part of the otic vessel, whereas ectopic  $\beta$ -gal expression in the somites was retained (Fig. 5F), indicating that expression in the FP is dependent on the Foxa2 site. However, Foxa2 is not expressed in the heart and otic vessel, so the dependence of  $\beta$ -gal expression on the Foxa2 site in these structures suggests that other forkhead proteins with similar binding properties occupy these sites.

*Corin* is a cell surface protease that is specifically expressed in mDA progenitors in the FP (Ono et al., 2007). Two FBRs were found in the *Corin* gene, only one of which is conserved. This element, called E1, was able to promote  $\beta$ -gal expression in the FP in the midbrain and caudal regions except in rhombomere 1 (Fig. 5E-E').

Taken together, these results demonstrate that at least some of the FBRs in the three genes analyzed have enhancer regulatory functions in the FP and that Foxa2 binding is required for enhancer activity in the case of the *Lmx1b* E1 element.

We also examined whether the FBRs in *Lmx1a*, *Lmx1b* and *Corin* function as enhancers in chick by electroporating the same constructs as above into the midbrain of stage 10 chick embryos

and analyzing  $\beta$ -gal activity 48 hours later. In this assay, *Lmx1b* E1 and *Corin* E1 promoted  $\beta$ -gal expression in the FP, whereas none of the three FBRs of *Lmx1a* showed activity (Fig. 6A,B; data not shown). Two additional FBRs, in *Bmp7* and *Slit2*, also promoted  $\beta$ -gal expression in the FP (Fig. 6A). These results indicate that some FBRs have enhancer functions in both mouse and chick.

### Foxa2 inhibits alternative midbrain neuronal fates by direct binding to cell fate determinants

Our earlier functional studies showed that Foxa2 promotes the fate specification of mDA neurons in part by inhibiting the expression of a dorsal and ventrolateral midbrain determinant, Helt, which is essential for the development of most midbrain GABAergic neurons (Miyoshi et al., 2004; Guimera et al., 2006; Nakatani et al., 2007). Since Foxa2 has been shown to act as a transcriptional activator in transfection experiments in vitro, it

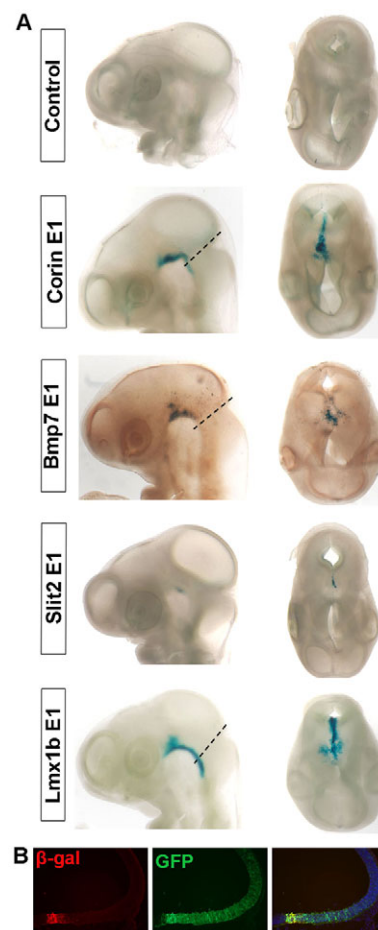

**Fig. 6. Screening of candidate enhancer elements bound by Foxa2 in chick embryos.** (A) The midbrain neuroepithelium of stage 10 chick embryos was electroporated with selected candidate enhancers in the *Lmx1a*, *Lmx1b*, *Bmp7*, *Slit2* and *Corin* genes cloned in a *lacZ* reporter construct. A GFP construct was co-electroporated with the test constructs to assess electroporation efficiency and the empty *lacZ* reporter construct was used as control (not shown). Embryos harvested 48 hours post-electroporation are shown in lateral view (left) and dorsal view (right). Dashed lines indicate midbrain-hindbrain boundary. (B) Coronal section of a chick embryo electroporated with the *Lmx1b* E1 *lacZ* construct showing GFP<sup>+</sup> electroporated cells in most of the midbrain (green), whereas  $\beta$ -gal expression (red) is restricted to the ventral midbrain. The right-hand image is a merge.

was unclear whether *Foxa2* directly represses *Helt* to suppress the GABAergic cell fate. Examination of the *Foxa2* ChIP-seq data showed that *Helt* is indeed bound by *Foxa2* and is therefore likely to be a direct target of *Foxa2* repression (supplementary material Table S1). In addition, *Foxa2* also represses a ventrolateral midbrain determinant, *Nkx2.2*, probably through direct binding (Lin et al., 2009).

Since *Foxa2* directly represses ventrolateral determinants such as *Helt* and *Nkx2.2* (Lin et al., 2009), we rationalized that intersecting our list of FBR-associated genes (FBGs) with a list of genes specifically expressed in ventrolateral midbrain might lead to the identification of additional genes that are normally repressed by *Foxa2* in the FP. A list of 312 genes specifically expressed in the ventrolateral midbrain was recently published (Gennet et al., 2011). Of the FBGs identified in this study, 108 were present in this list (hypergeometric analysis,  $P=2.47 \times 10^{-19}$ ; Fig. 4E), including genes that have been shown to be repressed in *Foxa1/2* cko mutants, such as *Gli1*, *Gli2* and *Gli3* (Mavromatakis et al., 2011), thus providing support for the initial rationale. Examination of the expression of five other transcription factors, namely *Tle4*, *Otx1*, *Sox1*, *Tal2* and *Pax3*, showed that all but *Pax3* exhibited expanded ventral midbrain expression in E10.5 *Foxa1/2* cko embryos (Fig. 7). These results strongly suggest that *Foxa2*-bound genes that are expressed in the ventrolateral midbrain represent an enriched list of genes that are repressed by *Foxa2* in the FP. Similar to genes that are positively regulated by *Foxa2* in the FP, some of the repressed genes might be indirectly regulated by *Foxa2*, although we have found that *Otx1* and *Ptch1* are ectopically expressed in the FP of *NestinCre;Foxa1<sup>-/-</sup>;Foxa2<sup>fllox/fllox</sup>* mutants in the absence of *Foxa1* and *Foxa2* at E12.5 (supplementary material Fig. S3). These results are consistent with the idea that these genes are directly repressed by *Foxa2*.

## DISCUSSION

In this study, we defined by ChIP-seq a comprehensive set of in vivo binding sites for the winged helix transcription factor *Foxa2* in mDA progenitors differentiated from *NestinLmx1a*-transfected ES cells. We detected 9160 FBRs, 80% of which have a *Foxa2* binding motif. This result suggests that *Foxa2* is recruited to DNA mainly by direct binding. ChIP-qPCR validation of 17 out of 19 selected FBRs using chromatin from mouse E12.5 ventral midbrain tissue suggests a high confidence genome-wide dataset for *Foxa2*-chromatin interactions.

Intersection of our dataset with a list of genes specifically expressed in FP and ventrolateral midbrain cells produced a statistically significant overlap, suggesting that *Foxa2* directly regulates many FP-specific and ventrolateral-specific genes. About 50% of these binding sites appear to be functionally relevant as expression of the associated genes was significantly reduced or lost in *Foxa1/2* cko embryos. As detailed above, direct targets of *Foxa2* in the FP include genes required in mDA neuron and FP differentiation, indicating a direct role for *Foxa2* in promoting these cellular programs. In addition, specification of FP identity also requires a *Foxa2*-dependent role in the repression of determinants of ventrolateral midbrain fates and attenuation of the *Shh* signaling pathway (Fig. 8). Finally, the genome-wide analysis of *Foxa2* target genes has also revealed a novel role of *Foxa2* in the guidance of axons across the FP (Fig. 4). The list of *Foxa2* target genes thus represents a valuable resource with which to dissect the role of novel factors in various aspects of FP and mDA neuron biology.

## FBRs identify FP enhancers

Our demonstration that several conserved FBRs have enhancer activity in the FP also suggests that our dataset can be used to identify novel cis-regulatory elements that are active in this region. Three out of six conserved FBRs promoted *lacZ* reporter expression in the FP along the whole length of the embryo and two out of six specifically in the midbrain FP. *Foxa2* binding motifs were found in all five functional enhancers, and mutation of this motif in FBRs in *Lmx1b* demonstrated that *Foxa2* binding is indeed essential for enhancer activity in the FP. Other enhancers that have previously been shown to require *Foxa2* for their activity in the FP, including elements in the *Shh*, *Foxa2* (autoregulatory element) and *Ferd13* genes, were also identified as FBRs in our ChIP-seq experiments. Comparison of the enhancers that are only active in the midbrain FP with those that are active in the whole FP might identify other transcription factors that promote or restrict gene expression to the midbrain.

## Gene regulatory networks involved in the specification of mDA neuron and FP identity

This study has provided new mechanistic insights into how *Foxa1/2* specify mDA progenitors. We demonstrate that *Foxa2* directly and positively regulates the expression of essential determinants of this lineage, including *Lmx1a/b* and *Ferd31* (Fig. 8). The latter transcription factors then release the repression of

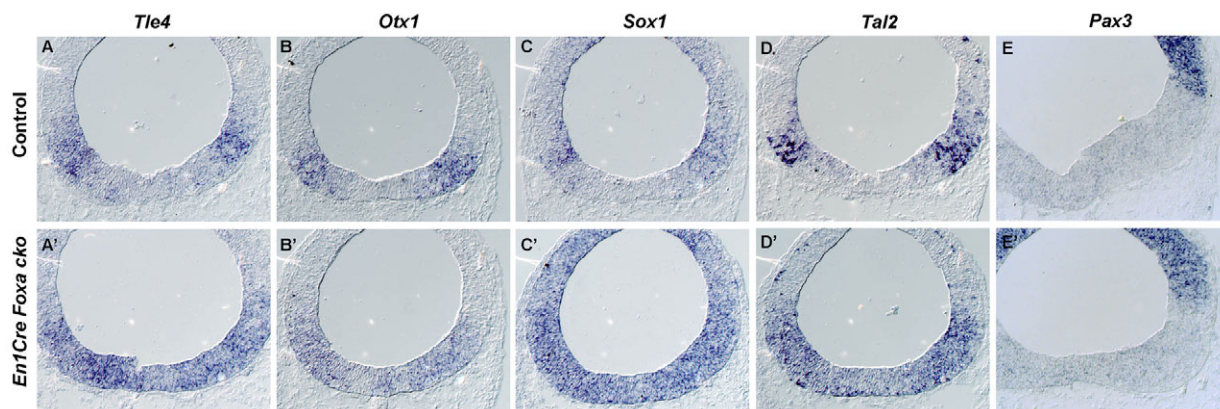

**Fig. 7. Inhibition of ventrolateral determinants in the FP of the midbrain.** (A-D') *Tle4*, *Otx1*, *Sox1* and *Tal2* are ectopically expressed in the FP in addition to their normal expression in the dorsal and/or ventrolateral midbrain regions of mouse E10.5 *Foxa1/2* cko mutants, as compared with control littermates. (E, E') No change was observed for *Pax3* expression in the dorsal midbrain between *Foxa1/2* cko mutants and control littermates.



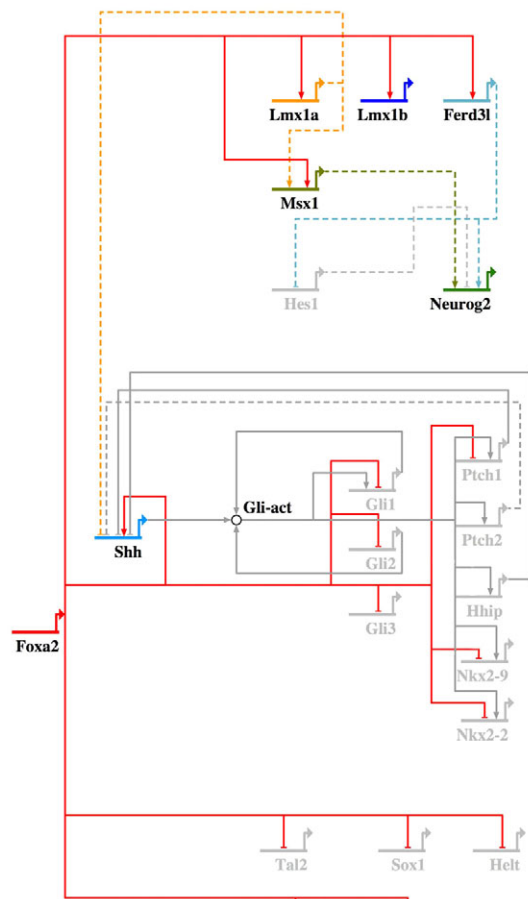

**Fig. 8. Model of the Foxa2-driven regulatory network in the midbrain FP.** A model for a Foxa2-driven transcriptional network regulating mDA neuronal and FP specification depicted using standard BioTapestry nomenclature (<http://www.biotapestry.org>) (Longabaugh et al., 2005). Non-expressed genes are in gray; expressed genes are in black or other colors. Foxa2 targets validated in this study by CHIP-qPCR and expression analysis in mutant embryos are indicated by bold red lines. Other colored broken lines indicate interactions based on other genetic studies in mice or chick (Ono et al., 2010; Andersson et al., 2006a; Yan et al., 2011). Gli-act, Gli activator.

*Neurog2* expression by *Hes1* (Kele et al., 2006; Andersson et al., 2006a), thereby enabling mDA progenitor cells of the FP to undergo neurogenesis and differentiation into mDA neurons.

We also show that Foxa2 represses in the ventral midbrain multiple components of the Shh signaling pathway, including the Shh receptor *Ptch1*, the transducers *Gli1*, *Gli2*, *Gli3*, and the transcription factors *Nkx2.2* (Mavromatakis et al., 2011) and *Nkx2.9* (data not shown). As Foxa2 expression is directly activated by Shh via *Gli1* and *Gli2*, Foxa2 acts as a feedback regulator to modulate the level and duration of Shh signaling. Interestingly, our ChIP-seq data suggest that Foxa2 performs this role by binding the same regulatory regions as Gli factors in a number of Shh pathway genes. The role of Foxa2 in the regulation of these targets is antagonistic to that of Gli, suggesting that Foxa2 might prevent recruitment of Gli to the regulatory elements, thereby blocking its activity. This role of attenuation of Shh signaling is important for the specification of FP identity, as prolonged Shh signaling leads to transformation of the FP into more dorsal midbrain identities (Ribes et al., 2010).

The fact that Foxa2 negatively regulates many Shh target genes as well as transcription factors expressed in ventrolateral midbrain progenitors (Fig. 8) suggests that, in addition to its role as an intrinsic activator, Foxa2 might function as a repressor. Foxa proteins behave as transcriptional activators in cell transfection assays, suggesting that Foxa2 repressor activity might involve the recruitment of a transcriptional repressor. The co-repressors Gro/TLE/Grg have been shown to interact with Foxa proteins (Sekiya and Zaret, 2007) and *Tle4* is expressed in the ventral midbrain, suggesting that it might participate in the repressive functions of Foxa1 and Foxa2. Future studies will concentrate on elucidating the identity of co-regulators that interact with Foxa1/2 to positively or negatively regulate distinct cell fates.

#### Acknowledgements

We thank Drs Klaus Kaestner and Paul Robson for initial help with the optimization of chromatin immunoprecipitation experiments and all colleagues who provided in situ hybridization probes.

#### Funding

This work was supported by the United Kingdom Medical Research Council. Deposited in PMC for release after 6 months.

#### Competing interests statement

The authors declare no competing financial interests.

#### Supplementary material

Supplementary material available online at <http://dev.biologists.org/lookup/suppl/doi:10.1242/dev.081034/-DC1>

#### References

- Agren, M., Kogerman, P., Kleman, M. I., Wessling, M. and Toftgard, R. (2004). Expression of the PTCH1 tumor suppressor gene is regulated by alternative promoters and a single functional Gli-binding site. *Gene* **330**, 101-114.
- Andersson, E., Jensen, J. B., Parmar, M., Guillemot, F. and Bjorklund, A. (2006a). Development of the mesencephalic dopaminergic neuron system is compromised in the absence of neurogenin 2. *Development* **133**, 507-516.
- Andersson, E., Tryggvason, U., Deng, Q., Friling, S., Alekseenko, Z., Robert, B., Perlmann, T. and Ericson, J. (2006b). Identification of intrinsic determinants of midbrain dopamine neurons. *Cell* **124**, 393-405.
- Ang, S. L. (2009). Foxa1 and Foxa2 transcription factors regulate differentiation of midbrain dopaminergic neurons. *Adv. Exp. Med. Biol.* **651**, 58-65.
- Ang, S. L. and Rossant, J. (1994). HNF-3 beta is essential for node and notochord formation in mouse development. *Cell* **78**, 561-574.
- Baas, D., Meinel, A., Benadiba, C., Bonnafant, E., Meinel, O., Reith, W. and Durand, B. (2006). A deficiency in RFX3 causes hydrocephalus associated with abnormal differentiation of ependymal cells. *Eur. J. Neurosci.* **24**, 1020-1030.
- Bailey, T. L. and Elkan, C. (1994). Fitting a mixture model by expectation maximization to discover motifs in biopolymers. *Proc. Int. Conf. Intell. Syst. Mol. Biol.* **2**, 28-36.
- Barski, A., Cuddapah, S., Cui, K., Roh, T. Y., Schones, D. E., Wang, Z., Wei, G., Chepelev, I. and Zhao, K. (2007). High-resolution profiling of histone methylations in the human genome. *Cell* **129**, 823-837.
- Blaess, S., Corrales, J. D. and Joyner, A. L. (2006). Sonic hedgehog regulates Gli activator and repressor functions with spatial and temporal precision in the mid/hindbrain region. *Development* **133**, 1799-1809.
- Brose, K. and Tessier-Lavigne, M. (2000). Slit proteins: key regulators of axon guidance, axonal branching, and cell migration. *Curr. Opin. Neurobiol.* **10**, 95-102.
- Collignon, J., Sockanathan, S., Hacker, A., Cohen-Tannoudji, M., Norris, D., Rastan, S., Stevanovic, M., Goodfellow, P. N. and Lovell-Badge, R. (1996). A comparison of the properties of Sox-3 with Sry and two related genes, Sox-1 and Sox-2. *Development* **122**, 509-520.
- Dai, P., Akimaru, H., Tanaka, Y., Maekawa, T., Nakafuku, M. and Ishii, S. (1999). Sonic Hedgehog-induced activation of the Gli1 promoter is mediated by GLI3. *J. Biol. Chem.* **274**, 8143-8152.
- Epstein, D. J., McMahon, A. P. and Joyner, A. L. (1999). Regionalization of Sonic hedgehog transcription along the anteroposterior axis of the mouse central nervous system is regulated by Hnf3-dependent and -independent mechanisms. *Development* **126**, 281-292.
- Ferri, A. L., Lin, W., Mavromatakis, Y. E., Wang, J. C., Sasaki, H., Whitsett, J. A. and Ang, S. L. (2007). Foxa1 and Foxa2 regulate multiple phases of midbrain dopaminergic neuron development in a dosage-dependent manner. *Development* **134**, 2761-2769.

- Friling, S., Andersson, E., Thompson, L. H., Jonsson, M. E., Hebsgaard, J. B., Nanou, E., Alekseenko, Z., Marklund, U., Kjellander, S., Volakakis, N. et al. (2009). Efficient production of mesencephalic dopamine neurons by Lmx1a expression in embryonic stem cells. *Proc. Natl. Acad. Sci. USA* **106**, 7613-7618.
- Gao, N., LeLay, J., Vatamaniuk, M. Z., Rieck, S., Friedman, J. R. and Kaestner, K. H. (2008). Dynamic regulation of Pdx1 enhancers by Foxa1 and Foxa2 is essential for pancreas development. *Genes Dev.* **22**, 3435-3448.
- Gasca, S., Hill, D. P., Klingensmith, J. and Rossant, J. (1995). Characterization of a gene trap insertion into a novel gene, cordon-bleu, expressed in axial structures of the gastrulating mouse embryo. *Dev. Genet.* **17**, 141-154.
- Gennet, N., Gale, E., Nan, X., Farley, E., Takacs, K., Oberwallner, B., Chambers, D. and Li, M. (2011). Doublesex and mab-3-related transcription factor 5 promotes midbrain dopaminergic identity in pluripotent stem cells by enforcing a ventral-medial progenitor fate. *Proc. Natl. Acad. Sci. USA* **108**, 9131-9136.
- Guimera, J., Weisenhorn, D. V. and Wurst, W. (2006). Megane/Heslike is required for normal GABAergic differentiation in the mouse superior colliculus. *Development* **133**, 3847-3857.
- Guo, C., Qiu, H. Y., Huang, Y., Chen, H., Yang, R. Q., Chen, S. D., Johnson, R. L., Chen, Z. F. and Ding, Y. Q. (2007). Lmx1b is essential for Fgf8 and Wnt1 expression in the isthmus organizer during tectum and cerebellum development in mice. *Development* **134**, 317-325.
- Hallikas, O., Palin, K., Sinjushina, N., Rautiainen, R., Partanen, J., Ukkonen, E. and Taipale, J. (2006). Genome-wide prediction of mammalian enhancers based on analysis of transcription-factor binding affinity. *Cell* **124**, 47-59.
- Hallonet, M., Kaestner, K. H., Martin-Parras, L., Sasaki, H., Betz, U. A. and Ang, S. L. (2002). Maintenance of the specification of the anterior definitive endoderm and forebrain depends on the axial mesendoderm: a study using HNF3beta/Foxa2 conditional mutants. *Dev. Biol.* **243**, 20-33.
- Hannenhalli, S. and Kaestner, K. H. (2009). The evolution of Fox genes and their role in development and disease. *Nat. Rev. Genet.* **10**, 233-240.
- Indra, A. K., Warot, X., Brocard, J., Bornert, J. M., Xiao, J. H., Chambon, P. and Metzger, D. (1999). Temporally-controlled site-specific mutagenesis in the basal layer of the epidermis: comparison of the recombinase activity of the tamoxifen-inducible Cre-ER(T) and Cre-ER(T2) recombinases. *Nucleic Acids Res.* **27**, 4324-4327.
- Jacob, J., Ferri, A. L., Milton, C., Prin, F., Pla, P., Lin, W., Gavalas, A., Ang, S. L. and Briscoe, J. (2007). Transcriptional repression coordinates the temporal switch from motor to serotonergic neurogenesis. *Nat. Neurosci.* **10**, 1433-1439.
- Johnson, D. S., Mortazavi, A., Myers, R. M. and Wold, B. (2007). Genome-wide mapping of in vivo protein-DNA interactions. *Science* **316**, 1497-1502.
- Kele, J., Semplicio, N., Ferri, A. L., Mira, H., Guillemot, F., Arenas, E. and Ang, S. L. (2006). Neurogenin 2 is required for the development of ventral midbrain dopaminergic neurons. *Development* **133**, 495-505.
- Kim, R. Y., Robertson, E. J. and Solloway, M. J. (2001). Bmp6 and Bmp7 are required for cushion formation and septation in the developing mouse heart. *Dev. Biol.* **235**, 449-466.
- Kolodkin, A. L. and Tessier-Lavigne, M. (2011). Mechanisms and molecules of neuronal wiring: a primer. *Cold Spring Harb. Perspect. Biol.* **3**, pii: a001727.
- Lee, C. S., Friedman, J. R., Fulmer, J. T. and Kaestner, K. H. (2005). The initiation of liver development is dependent on Foxa transcription factors. *Nature* **435**, 944-947.
- Li, H., Ruan, J. and Durbin, R. (2008). Mapping short DNA sequencing reads and calling variants using mapping quality scores. *Genome Res.* **18**, 1851-1858.
- Lin, W., Metzakopian, E., Mavromatakis, Y. E., Gao, N., Balaskas, N., Sasaki, H., Briscoe, J., Whitsett, J. A., Goulding, M., Kaestner, K. H. et al. (2009). Foxa1 and Foxa2 function both upstream of and cooperatively with Lmx1a and Lmx1b in a feedforward loop promoting mesodiencephalic dopaminergic neuron development. *Dev. Biol.* **333**, 386-396.
- Longabaugh, W. J., Davidson, E. H. and Bolouri, H. (2005). Computational representation of developmental genetic regulatory networks. *Dev. Biol.* **283**, 1-16.
- Mansour, A. A., Nissim-Eliraz, E., Zisman, S., Golan-Lev, T., Schatz, O., Klar, A. and Ben-Arie, N. (2011). Foxa2 regulates the expression of Nato3 in the floor plate by a novel evolutionarily conserved promoter. *Mol. Cell. Neurosci.* **46**, 187-199.
- Mavromatakis, Y. E., Lin, W., Metzakopian, E., Ferri, A. L., Yan, C. H., Sasaki, H., Whitsett, J. and Ang, S. L. (2011). Foxa1 and Foxa2 positively and negatively regulate Shh signalling to specify ventral midbrain progenitor identity. *Mech. Dev.* **128**, 90-103.
- Miyoshi, G., Bessho, Y., Yamada, S. and Kageyama, R. (2004). Identification of a novel basic helix-loop-helix gene, Heslike, and its role in GABAergic neurogenesis. *J. Neurosci.* **24**, 3672-3682.
- Nakatani, T., Minaki, Y., Kumai, M. and Ono, Y. (2007). Helt determines GABAergic over glutamatergic neuronal fate by repressing Ngn genes in the developing mesencephalon. *Development* **134**, 2783-2793.
- Norton, W. H., Mangoli, M., Lele, Z., Pogoda, H. M., Diamond, B., Mercurio, S., Russell, C., Teraoka, H., Stickney, H. L., Rauch, G. J. et al. (2005). Monorail/Foxa2 regulates floorplate differentiation and specification of oligodendrocytes, serotonergic raphe neurones and cranial motoneurons. *Development* **132**, 645-658.
- Ono, Y., Nakatani, T., Sakamoto, Y., Mizuhara, E., Minaki, Y., Kumai, M., Hamaguchi, A., Nishimura, M., Inoue, Y., Hayashi, H. et al. (2007). Differences in neurogenic potential in floor plate cells along an anteroposterior location: midbrain dopaminergic neurons originate from mesencephalic floor plate cells. *Development* **134**, 3213-3225.
- Ono, Y., Nakatani, T., Minaki, Y. and Kumai, M. (2010). The basic helix-loop-helix transcription factor Nato3 controls neurogenic activity in mesencephalic floor plate cells. *Development* **137**, 1897-1906.
- Peterson, R. S., Clevidence, D. E., Ye, H. and Costa, R. H. (1997). Hepatocyte nuclear factor-3 alpha promoter regulation involves recognition by cell-specific factors, thyroid transcription factor-1, and autoactivation. *Cell Growth Differ.* **8**, 869-882.
- Puelles, E., Acampora, D., Lacroix, E., Signore, M., Annino, A., Tuorto, F., Filosa, S., Corte, G., Wurst, W., Ang, S. L. et al. (2003). Otx dose-dependent integrated control of antero-posterior and dorso-ventral patterning of midbrain. *Nat. Neurosci.* **6**, 453-460.
- Ribes, V., Balaskas, N., Sasai, N., Cruz, C., Dessaud, E., Cayuso, J., Tozer, S., Yang, L. L., Novitsch, B., Marti, E. et al. (2010). Distinct Sonic Hedgehog signaling dynamics specify floor plate and ventral neuronal progenitors in the vertebrate neural tube. *Genes Dev.* **24**, 1186-1200.
- Robertson, G., Hirst, M., Bainbridge, M., Bilenky, M., Zhao, Y., Zeng, T., Euskirchen, G., Bernier, B., Varhol, R., Delaney, A. et al. (2007). Genome-wide profiles of STAT1 DNA association using chromatin immunoprecipitation and massively parallel sequencing. *Nat. Methods* **4**, 651-657.
- Salmon-Divon, M., Dvinge, H., Tammoja, K. and Bertone, P. (2010). PeakAnalyzer: genome-wide annotation of chromatin binding and modification loci. *BMC Bioinformatics* **11**, 415.
- Santagati, F., Abe, K., Schmidt, V., Schmitt-John, T., Suzuki, M., Yamamura, K. and Imai, K. (2003). Identification of cis-regulatory elements in the mouse Pax9/Nkx2-9 genomic region: implication for evolutionary conserved synteny. *Genetics* **165**, 235-242.
- Sapir, T., Geiman, E. J., Wang, Z., Velasquez, T., Mitsui, S., Yoshihara, Y., Frank, E., Alvarez, F. J. and Goulding, M. (2004). Pax6 and engrailed 1 regulate two distinct aspects of rensaw cell development. *J. Neurosci.* **24**, 1255-1264.
- Sasaki, H. and Hogan, B. L. (1996). Enhancer analysis of the mouse HNF-3 beta gene: regulatory elements for node/notochord and floor plate are independent and consist of multiple sub-elements. *Genes Cells* **1**, 59-72.
- Sasaki, H., Hui, C., Nakafuku, M. and Kondoh, H. (1997). A binding site for Gli proteins is essential for HNF-3beta floor plate enhancer activity in transgenics and can respond to Shh in vitro. *Development* **124**, 1313-1322.
- Scardigli, R., Schuurmans, C., Gradwohl, G. and Guillemot, F. (2001). Crossregulation between Neurogenin2 and pathways specifying neuronal identity in the spinal cord. *Neuron* **31**, 203-217.
- Segev, E., Halachmi, N., Salzberg, A. and Ben-Arie, N. (2001). Nato3 is an evolutionarily conserved bHLH transcription factor expressed in the CNS of Drosophila and mouse. *Mech. Dev.* **106**, 197-202.
- Sekiya, T. and Zaret, K. S. (2007). Repression by Groucho/TLE/Grg proteins: genomic site recruitment generates compacted chromatin in vitro and impairs activator binding in vivo. *Mol. Cell* **28**, 291-303.
- Shin, H., Liu, T., Manrai, A. K. and Liu, X. S. (2009). CEAS: cis-regulatory element annotation system. *Bioinformatics* **25**, 2605-2606.
- Silva, J. P., von Meyenn, F., Howell, J., Thorens, B., Wolfrum, C. and Stoffel, M. (2009). Regulation of adaptive behaviour during fasting by hypothalamic Foxa2. *Nature* **462**, 646-650.
- Vokes, S. A., Ji, H., McCuine, S., Tenzen, T., Giles, S., Zhong, S., Longabaugh, W. J., Davidson, E. H., Wong, W. H. and McMahon, A. P. (2007). Genomic characterization of Gli-activator targets in sonic hedgehog-mediated neural patterning. *Development* **134**, 1977-1989.
- Wan, H., Dingle, S., Xu, Y., Besnard, V., Kaestner, K. H., Ang, S. L., Wert, S., Stahlman, M. T. and Whitsett, J. A. (2005). Compensatory roles of Foxa1 and Foxa2 during lung morphogenesis. *J. Biol. Chem.* **280**, 13809-13816.
- Wang, K. H., Brose, K., Arnott, D., Kidd, T., Goodman, C. S., Henzel, W. and Tessier-Lavigne, M. (1999). Biochemical purification of a mammalian slit protein as a positive regulator of sensory axon elongation and branching. *Cell* **96**, 771-784.
- Weinstein, D. C., Ruiz i Altaba, A., Chen, W. S., Hoodless, P., Prezioso, V. R., Jessell, T. M. and Darnell, J. E., Jr (1994). The winged-helix transcription factor HNF-3 beta is required for notochord development in the mouse embryo. *Cell* **78**, 575-588.
- Yan, C. H., Levesque, M., Claxton, S., Johnson, R. L. and Ang, S. L. (2011). Lmx1a and Lmx1b function cooperatively to regulate proliferation, specification, and differentiation of midbrain dopaminergic progenitors. *J. Neurosci.* **31**, 12413-12425.
- Zhang, Y., Liu, T., Meyer, C. A., Eeckhoutte, J., Johnson, D. S., Bernstein, B. E., Nussbaum, C., Myers, R. M., Brown, M., Li, W. et al. (2008). Model-based analysis of ChIP-Seq (MACS). *Genome Biol.* **9**, R137.
